# Supplementary material for: Validation of the Chinese version of the Five-Part questionnaire for screening joint hypermobility in young adults
Source: Research Square preprint supplement (doi:10.21203/rs.3.rs-7798432/v1), 2025-10-08
Supplement: Supplementary file 1 [file 189953a5f841e9c97df631d1.docx]

| Table 2. Demographics of participants | |  |  |  |  |  |
| --- | --- | --- | --- | --- | --- | --- |
| Variabl**es** | Validity Group | | | Reliability Group | | |
| Male | Female | Total | Male | Female | Total |
| Number | 286 (46.5%) | 329 (53.5%) | 615 (100%) | 139 (42.8%) | 186 (57.2%) | 325 (100%) |
| Age (years) | 19.62 ± 1.35 | 19.59 ± 1.39 | 19.6 ± 1.38 | 19.99 ± 1.42 | 19.73 ± 1.49 | 19.84 ± 1.46 |
| Height (m) | 1.77 ± .06 | 1.65 ± .07 | 1.71 ± .09 | 1.78 ±.07 | 1.67 ± .07 | 1.71 ± .09 |
| Weight (kg) | 68.36 ± 11.04 | 54.7 ± 8.59 | 61.06 ± 11.94 | 70.77 ± 9.36 | 55.61 ± 9.15 | 62.09 ± 11.9 |
| BMI (kg·m-2) | 21.84 ± 3.09 | 20.01 ± 2.64 | 20.86 ± 3 | 22.39 ±2.4 | 19.94 ± 2.52 | 20.99 ± 2.75 |

BMI: body mass index
