# Supplementary material for: Validation of the Chinese version of the Five-Part questionnaire for screening joint hypermobility in young adults
Source: Research Square preprint supplement (doi:10.21203/rs.3.rs-7798432/v1), 2025-10-08
Supplement: Supplementary file 2 [file 3026a68d36f712d0d01c08e7.docx]

Table 5. 5PQ-CN item-specific distribution grouped by

| Items | GJH Positive | |  | GJH Negative | |  | *OR* | 95% *CI* | |
| --- | --- | --- | --- | --- | --- | --- | --- | --- | --- |
|  | yes | no |  | yes | no |  |  |  |  |
| 1* | 266 (43.3%) | 42 (6.8%) |  | 168 (27.3%) | 139 (22.6%) |  | 5.24 | 3.53 | 7.78 |
| 2* | 111 (18%) | 197 (32%) |  | 20 (3.3%) | 287 (46.7%) |  | 8.09 | 4.86 | 13.46 |
| 3* | 217 (35.3%) | 91 (14.8%) |  | 99 (16.1%) | 208 (33.8%) |  | 5.01 | 3.56 | 7.06 |
| 4 | 25 (4.1%) | 283 (46%) |  | 21 (3.4%) | 286 (46.5%) |  | 1.20 | .66 | 2.20 |
| 5* | 69 (11.2%) | 239 (38.9%) |  | 29 (4.7%) | 278 (45.2%) |  | 2.77 | 1.74 | 4.41 |

*: *p* <.001 in *χ2*, GJH: generalized joint hypermobility, *OR*: odds ratio, *CI*: confidence interval
