# Supplementary material for: Validation of the Chinese version of the Five-Part questionnaire for screening joint hypermobility in young adults
Source: Research Square preprint supplement (doi:10.21203/rs.3.rs-7798432/v1), 2025-10-08
Supplement: Supplementary file 3 [file 7f88751323049a7489238b35.docx]

Table 6. 5PQ-CN test-retest reliability

| Variables | 1st round | 2nd round |
| --- | --- | --- |
| Positive | 179 (55.1%) | 171 (52.6%) |
| Negative | 146 (44.9%) | 154 (47.4%) |
| Total | 325 (100%) | 325 (100%) |
|  |  |  |
| mean accumulative score | 1.65 ± 1.18 | 1.61 ± 1.18 |
