# Supplementary material for: Validation of the Chinese version of the Five-Part questionnaire for screening joint hypermobility in young adults
Source: Research Square preprint supplement (doi:10.21203/rs.3.rs-7798432/v1), 2025-10-08
Supplement: Supplementary file 4 [file 918e8c6fb514b754bce6dd63.docx]

| Table 4. GJH Diagnosis by 5PQ-CN | | |  |
| --- | --- | --- | --- |
| GJH status | TRUE | FALSE | Sum |
| Positive | 242 (39.3%) | 105 (17.1%) | 347 (56.4%) |
| Negative | 202 (32.8%) | 66 (10.7%) | 268 (43.6%) |
| Total | 444 (72.2%) | 171 (27.8%) | 615 (100%) |

GJH: generalized joint hypermobility
