# Supplementary material for: Validation of the Chinese version of the Five-Part questionnaire for screening joint hypermobility in young adults
Source: Research Square preprint supplement (doi:10.21203/rs.3.rs-7798432/v1), 2025-10-08
Supplement: Supplementary file 5 [file 9c333f209ef0b1e7cad3deb4.docx]

Table 7. Item-specific distribution of 5PQ-CN in both round of test

| Items | 1st Round | |  | 2nd Round | |  | Changed responses | | kappa |
| --- | --- | --- | --- | --- | --- | --- | --- | --- | --- |
|  | yes | no |  | yes | no |  |  |  |  |
| 1 | 231 (71.1%) | 94 (28.9%) |  | 223 (68.6%) | 102 (31.4%) |  | 46 (14.2%) |  | 0.664^ |
| 2* | 41 (14.5%) | 278 (85.5%) |  | 79 (24.3%) | 246 (75.7%) |  | 48 (14.8%) |  | 0.535^ |
| 3* | 180 (55.4%) | 145 (44.6%) |  | 151 (46.5%) | 174 (53.5%) |  | 63 (19.4%) |  | 0.615^ |
| 4 | 27 (8.3%) | 298 (91.7%) |  | 21 (6.5%) | 304 (93.5%) |  | 18 (5.5%) |  | 0.596^ |
| 5 | 52 (16%) | 273 (84%) |  | 50 (15.4%) | 275 (84.6%) |  | 48 (14.8%) |  | 0.442^ |

*: *p* < .001 in McNemar’s test, ^: *p* < .001 for kappa
