# Supplementary material for: Validation of the Chinese version of the Five-Part questionnaire for screening joint hypermobility in young adults
Source: Research Square preprint supplement (doi:10.21203/rs.3.rs-7798432/v1), 2025-10-08
Supplement: Supplementary file 6 [file cd0386eb40ea15daaddee2ef.docx]

Table 1. The five part questionnaire and its Chinese translation

| Items | 5PQ | 5PQ-CN |
| --- | --- | --- |
| 1 | Can you now [or could you ever] place your hands flat on the floor without bending knees? | 您现在或曾经是否可以在不弯曲膝盖的情况下将双手手掌展开、向下平放在地面上？ |
| 2 | Can you now [or could you ever] bend your thumb to touch your forearm? | 您现在或曾经是否可以将您的大拇指弯曲到触碰您手臂的程度？ |
| 3 | As a child, did you amuse your friends by contorting your body into strange shapes or could you do the splits? | 当您还是孩子的时候，您是否曾经将您的身体扭曲成奇怪的形状来逗您的朋友开心？或者您可以做劈腿动作吗？ |
| 4 | As a child or teenager, did your kneecap or shoulder dislocate on more than one occasion? | 在您还是孩子或青少年的时候，你的肩膀或者髌骨（膝盖）是否曾经不止一次地脱臼？ |
| 5 | Do you consider yourself “double-jointed”? | 您觉得您自己的关节过度灵活吗？ |

5PQ: five part questionnaire, 5PQ-CN: Chinese version of 5PQ
